# Supplementary figures and images for: Neuron-wide RNA transport combines with netrin-mediated local translation to spatially regulate the synaptic proteome
Source: eLife journal article supplement (doi:10.7554/elife.04158), 2015-01-08

**A.**Local perfusion  
with 5xASW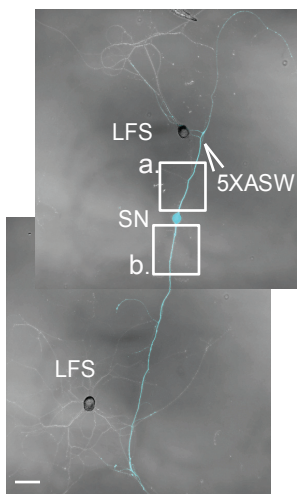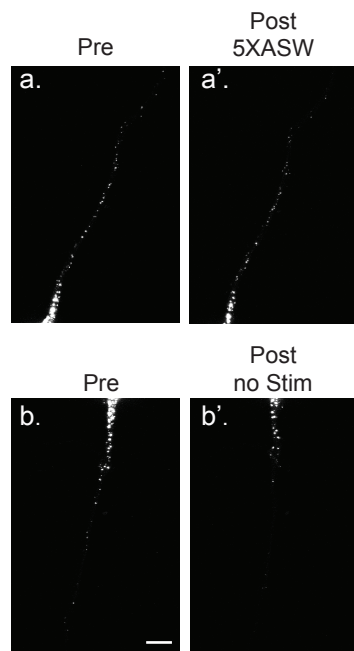**B.**Local perfusion  
with 5x5HT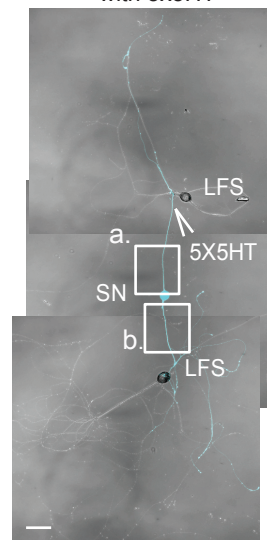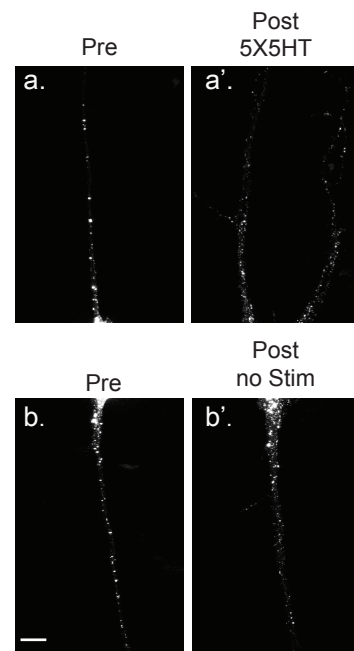**C.**

Control (5xASW)

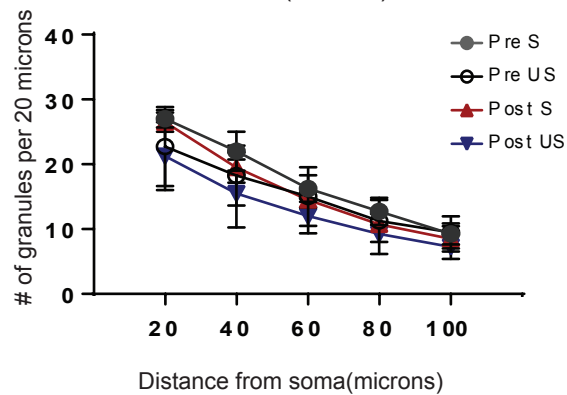**D.**

5X5HT

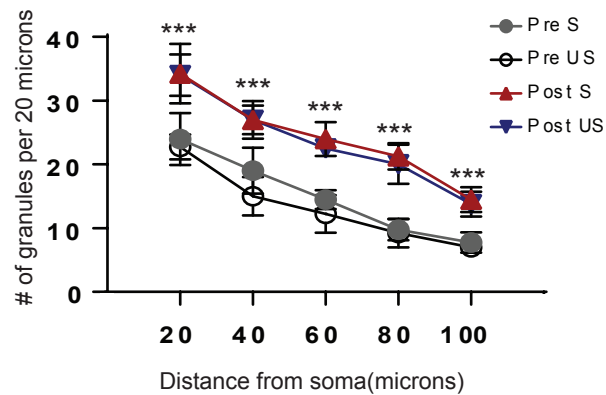

Supplement: supp [file elife-04158-supp-v1.zip]

**A.**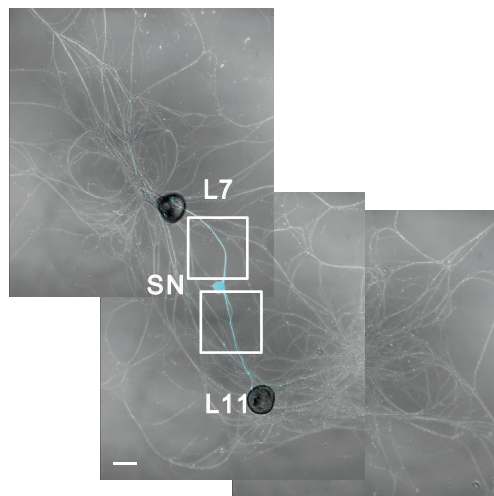**B.**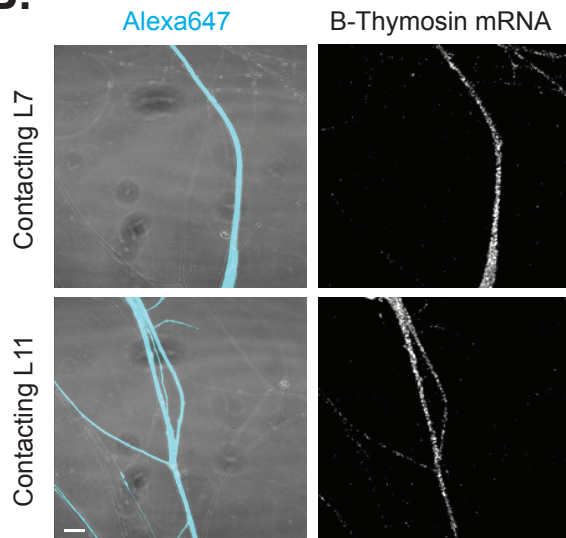**C.**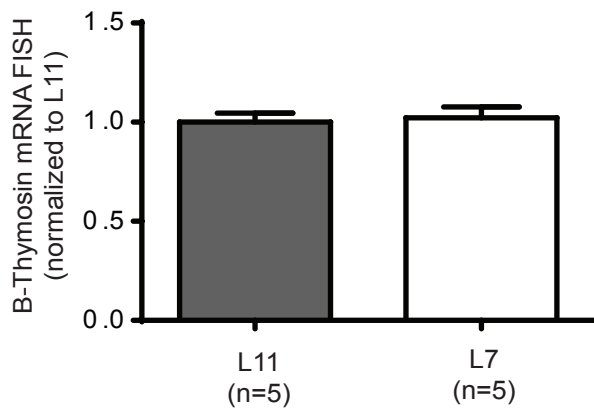

Supplement: supp [file elife-04158-supp-v1.zip]

**A.**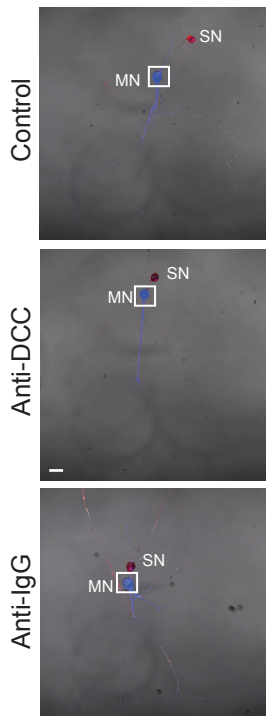**B.**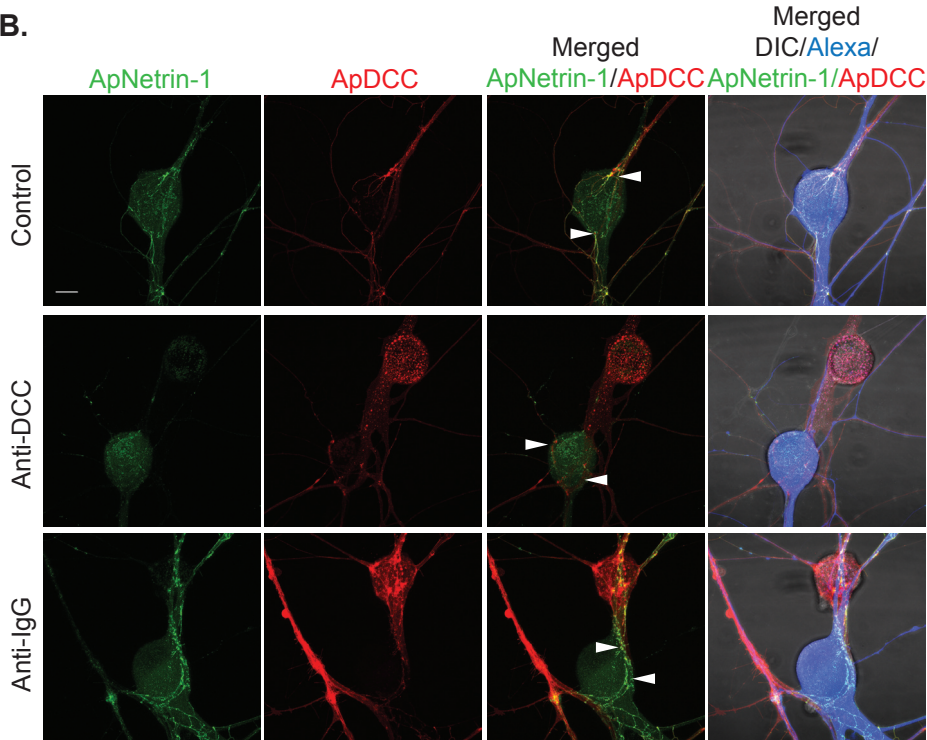**C.**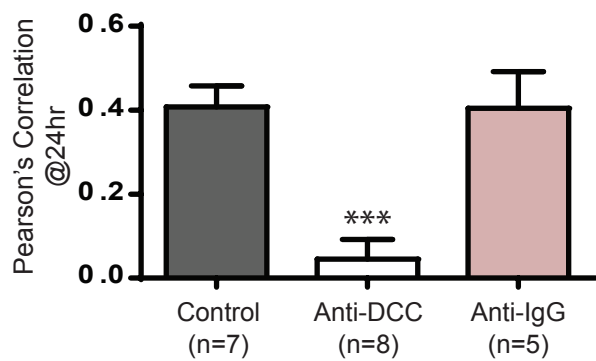

Supplement: supp [file elife-04158-supp-v1.zip]

**A.**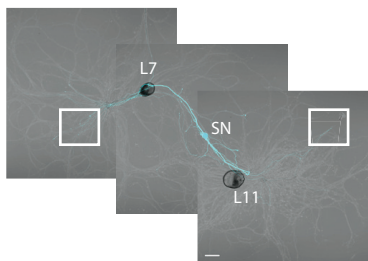**B.**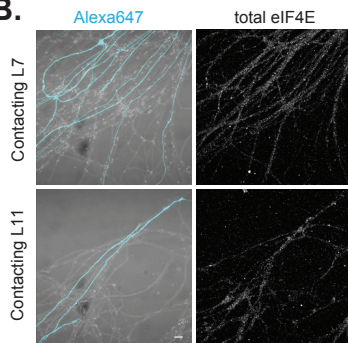**C.**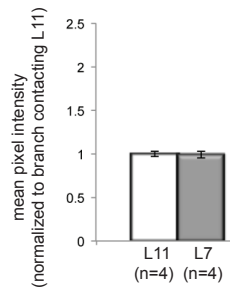**D.**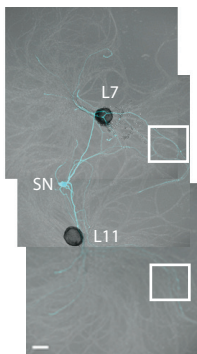**E.**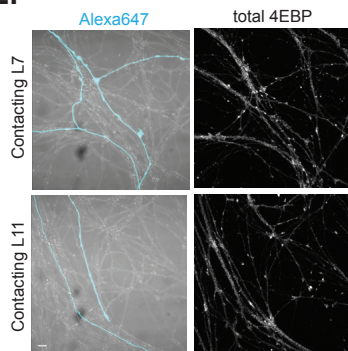**F.**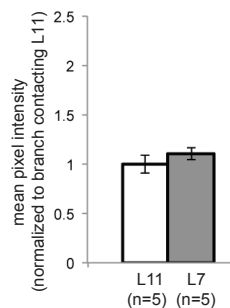**G.**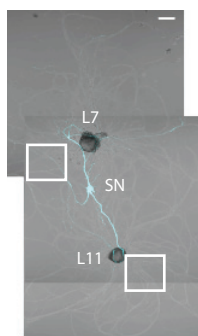**H.**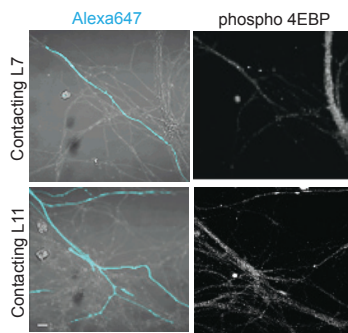**I.**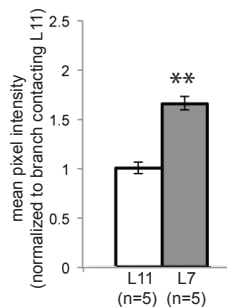**J.**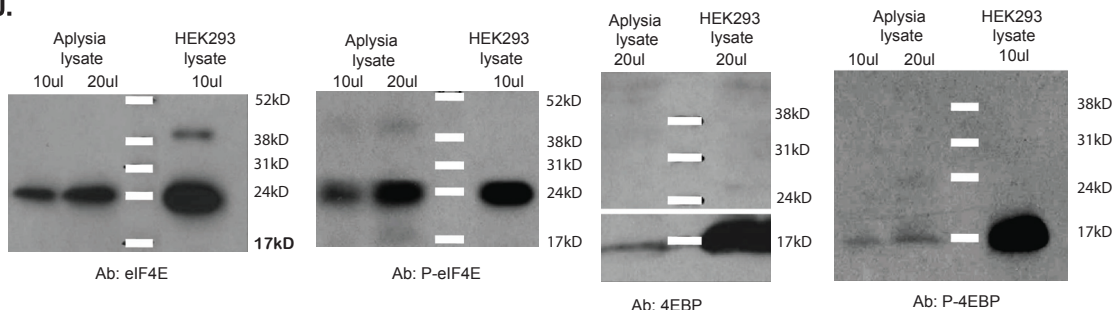

Supplement: supp [file elife-04158-supp-v1.zip]

**A.**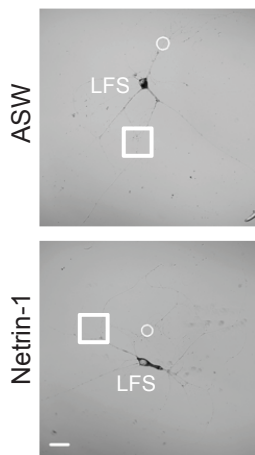**B.**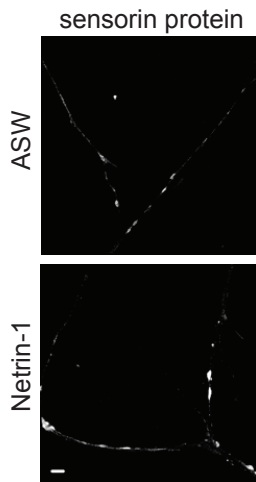**C.**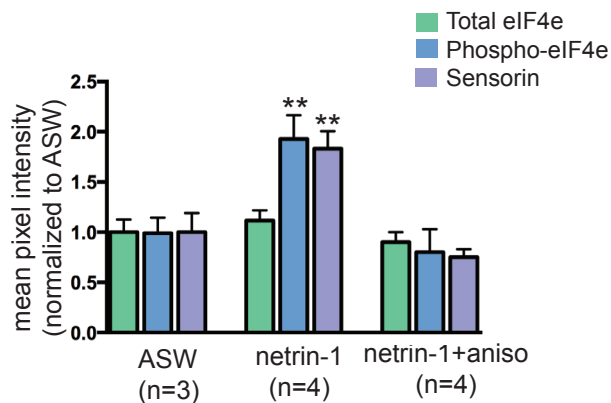**D.**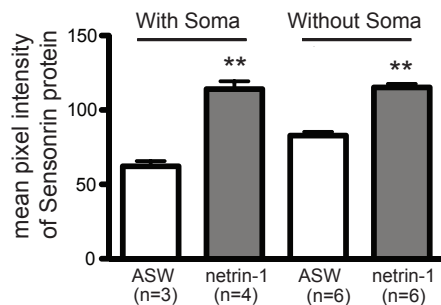

Supplement: supp [file elife-04158-supp-v1.zip]

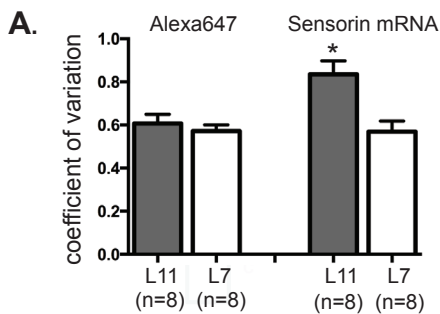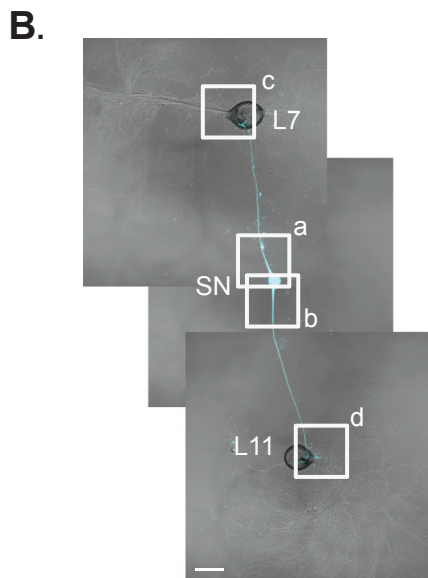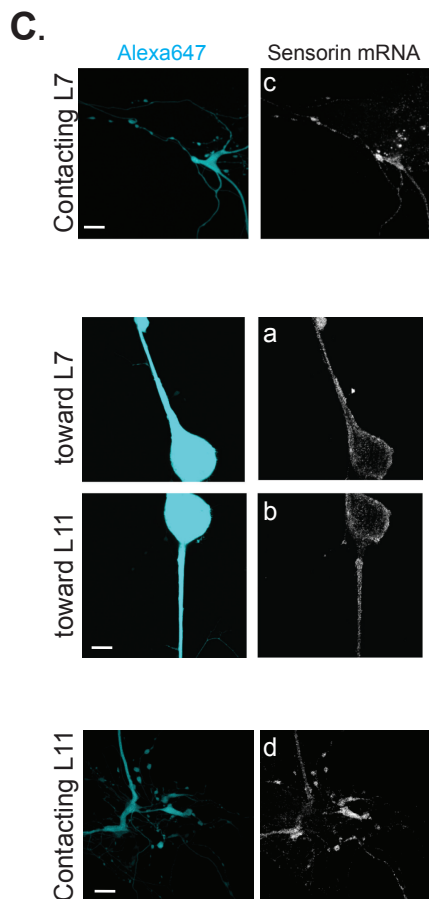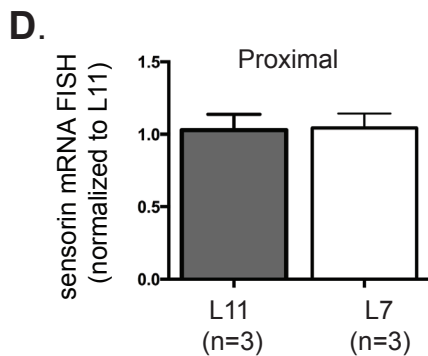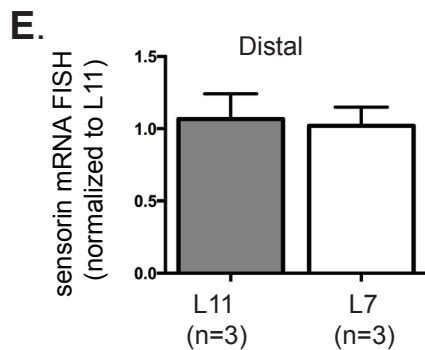

Supplement: supp [file elife-04158-supp-v1.zip]

**A.**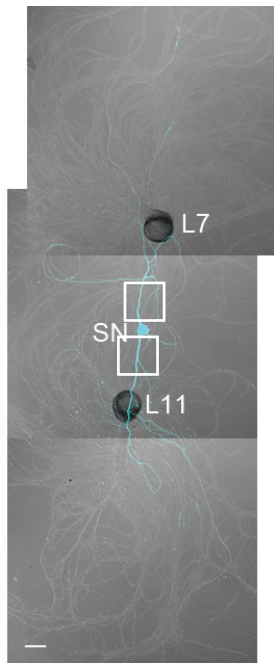**B.**

Alexa 647

28S rRNA

Contacting L7

Contacting L11

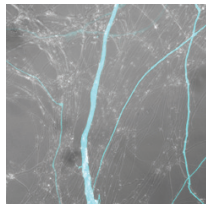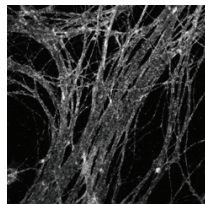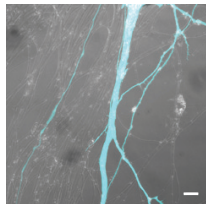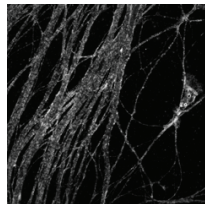**C.**28S rRNA FISH  
(normalized to branch  
contacting L11)1.5  
1.0  
0.5  
0.0L11  
(n=3)L7  
(n=3)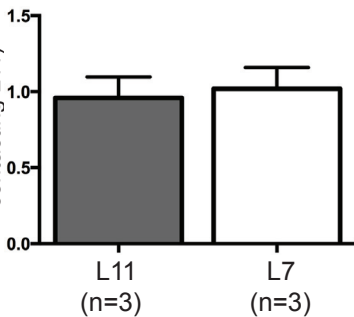

Supplement: supp [file elife-04158-supp-v1.zip]
